# Supplementary material
Source: publisher site journal article supplement (https://www.spandidos-publications.com/4749/downloadSupplementary)

Figure S1. Gas chromatograms for of crude methanolic extracts of *Andrographis paniculata* showing the 21 identified components.

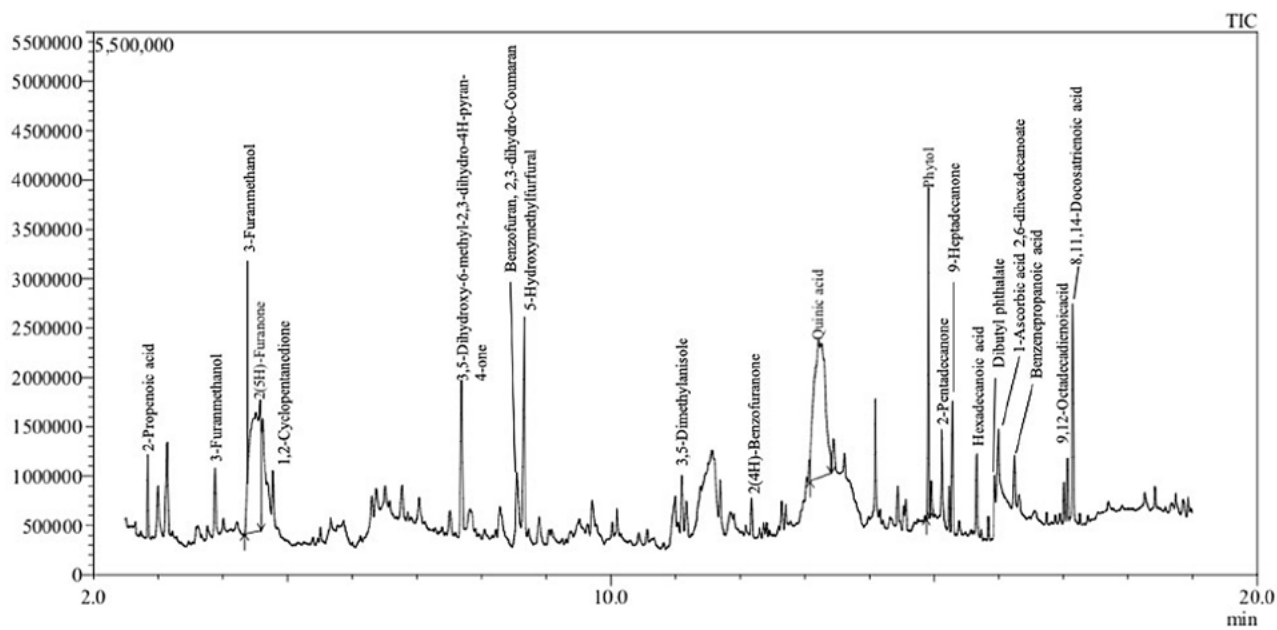

Supplement: Supplementary file 1 [file downloadSupplementary]
